# Supplementary material for: The role of phosphoprotein phosphatases catalytic subunit genes in pancreatic cancer
Source: PubMed Central journal article supplement (PMC7785039; doi:10.1042/bsr20203282), 2021-01-04
Supplement: BSR-2020-3282_supp.pdf [file BSR-2020-3282_supp.pdf]

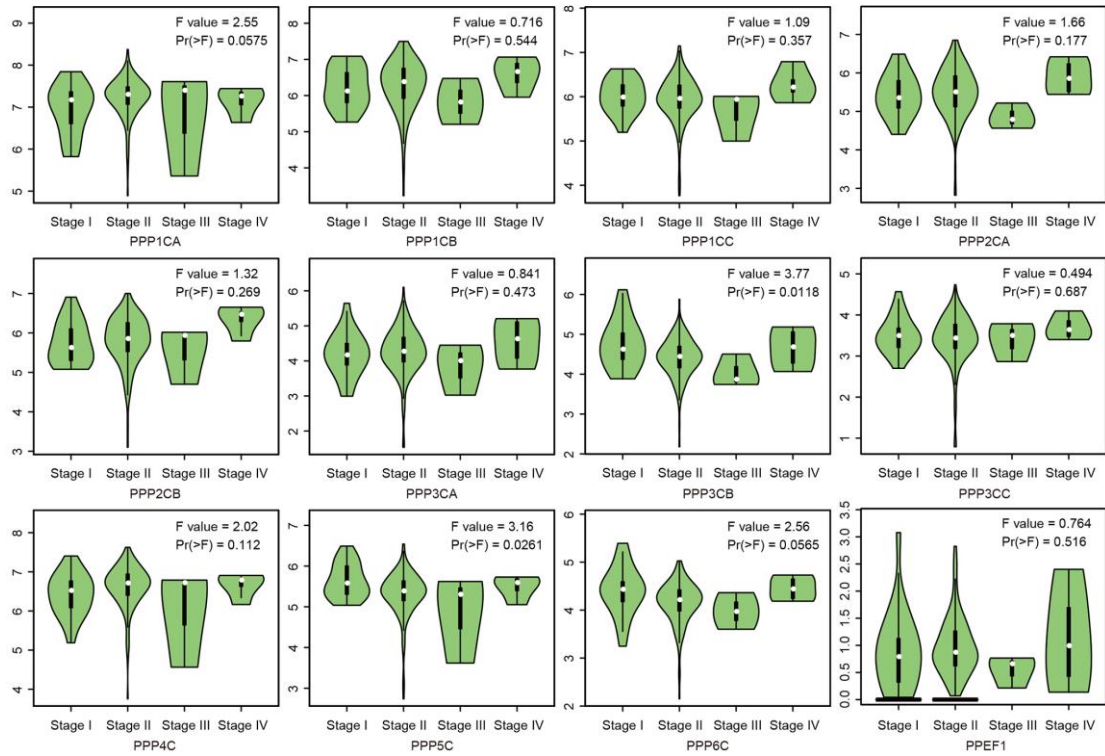

Supplementary Figure 1. The correlations between PPPcs and tumor stage in pancreatic cancer.

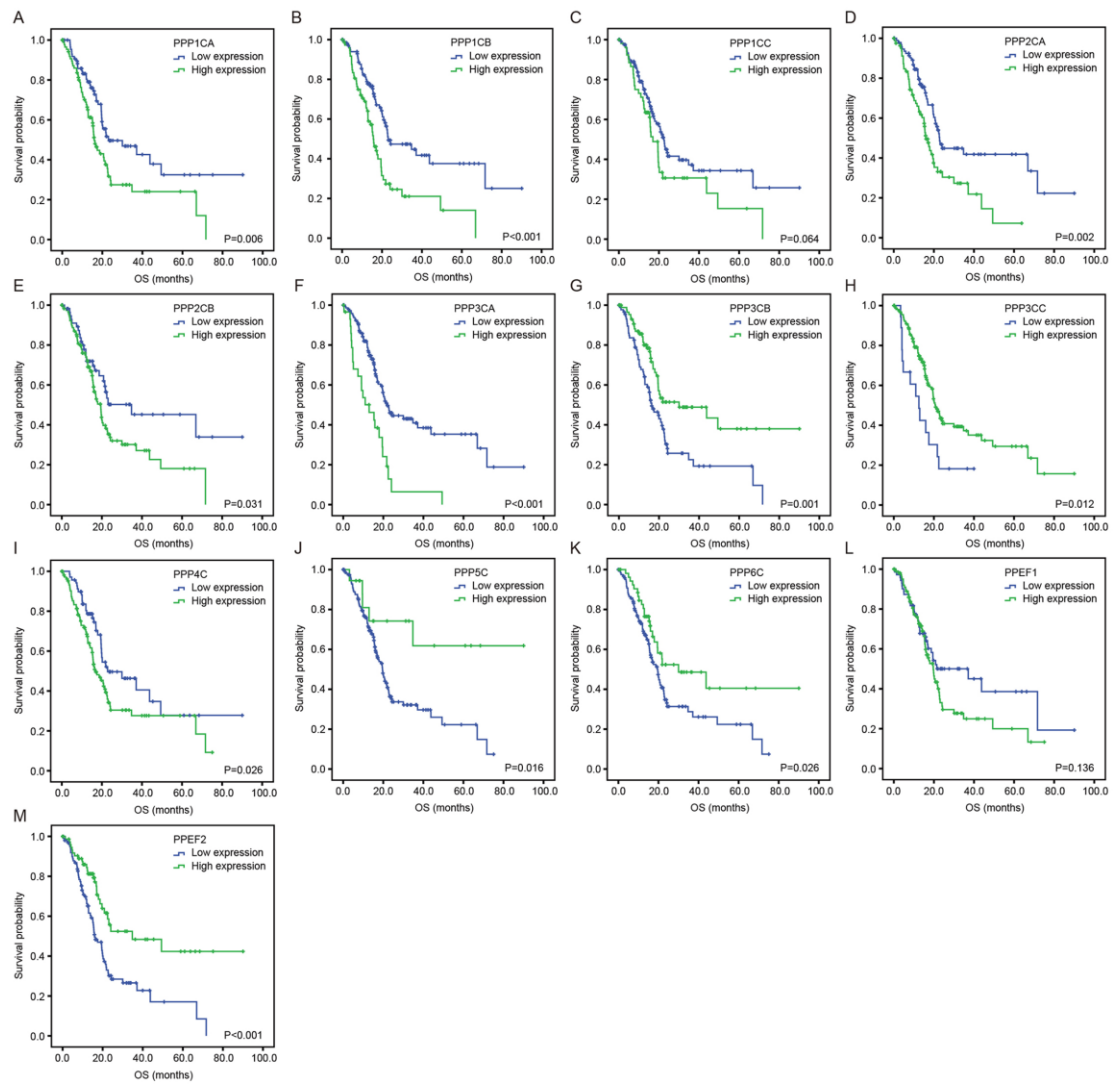

Supplementary Figure 2. Kaplan-Meier analysis estimates OS according to the transcription expression of PPPs in pancreatic cancer.

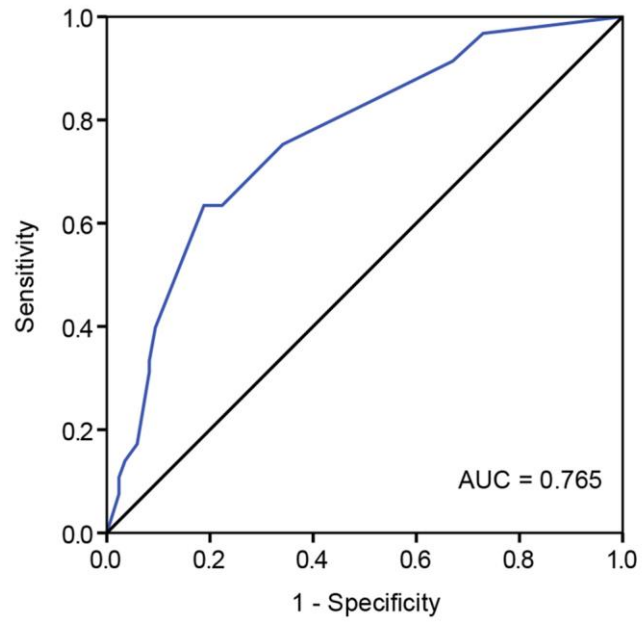

Supplementary Figure 3. Construction of the integrated prognostic classifier of the PPPcs.

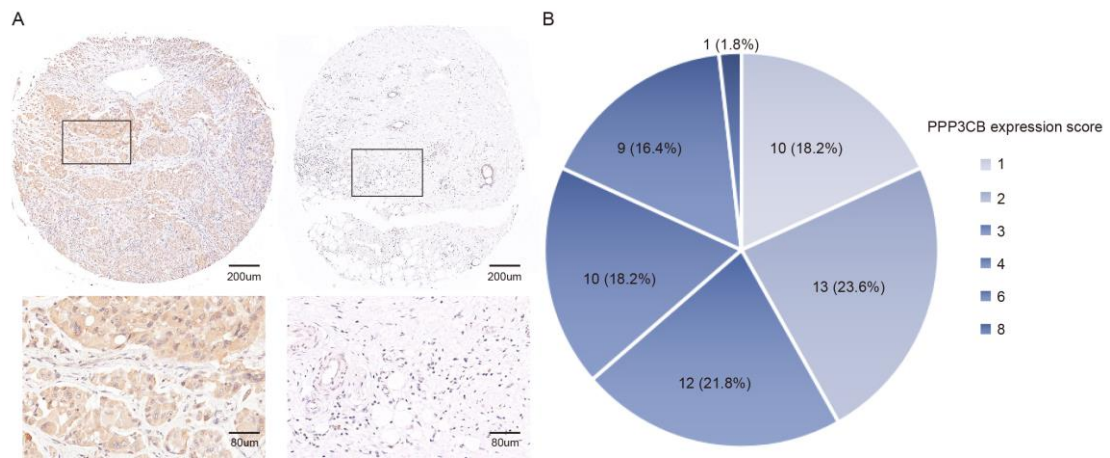

Supplementary Figure 4. The representative images of PPP3CB - high/low expression (A) and the distribution pattern of the immunohistochemical results in pancreatic cancer (B).

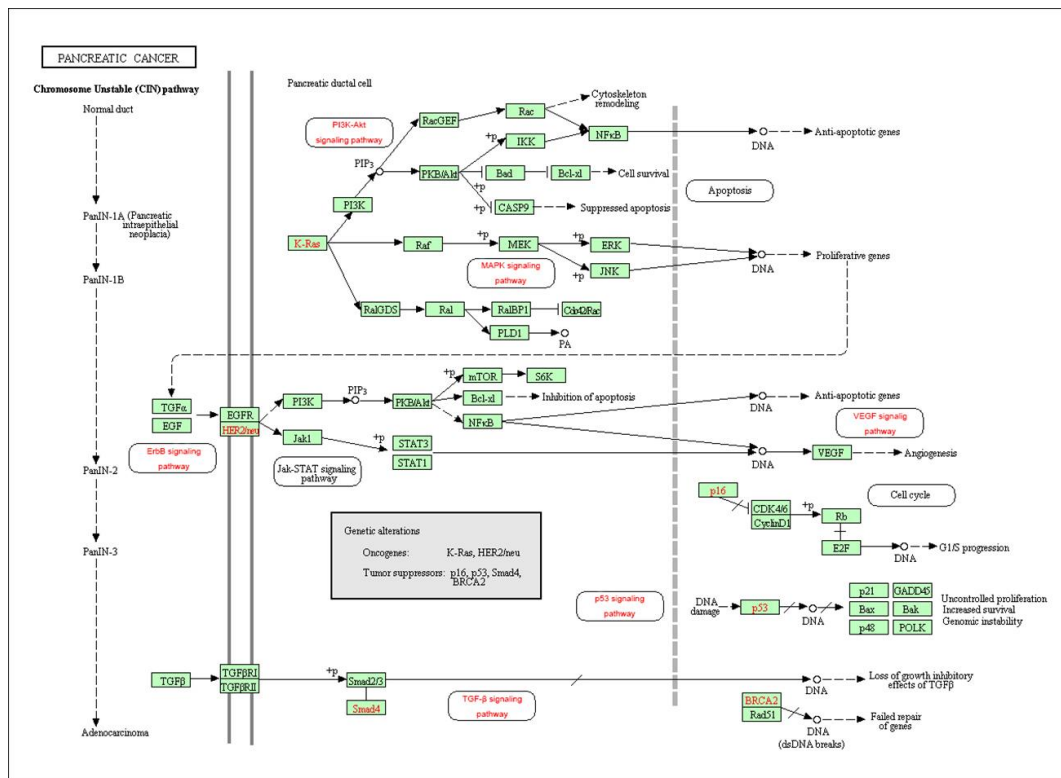

Supplementary Figure 5. Signal pathways affected by PPPCs' alteration in pancreatic cancer (in red).

Supplementary Table 1. Human PPP catalytic subunit genes and their functions

| PPP catalytic subunits |                |        |                                                                                 |
|------------------------|----------------|--------|---------------------------------------------------------------------------------|
| PPPs                   | Name           | Gene   | Reported functions in pancreatic cancer                                         |
| Ppp1                   | Ppp1c $\alpha$ | PPP1CA | Regulation of p53, oxidative stress regulation                                  |
|                        | Ppp1c $\beta$  | PPP1CB |                                                                                 |
|                        | Ppp1c $\gamma$ | PPP1CC |                                                                                 |
| Ppp2                   | Ppp2c $\alpha$ | PPP2CA | Promotion of c-Myc degradation, inhibition of TGF- $\beta$ induced invasiveness |
|                        | Ppp2c $\beta$  | PPP2CB |                                                                                 |
| Ppp3                   | Ppp3c $\alpha$ | PPP3CA | NA                                                                              |
|                        | Ppp3c $\beta$  | PPP3CB |                                                                                 |
|                        | Ppp3c $\gamma$ | PPP3CC |                                                                                 |
| Ppp4                   | Ppp4c          | PPP4C  | Overexpression and affecting prognosis                                          |
| Ppp5                   | Ppp5c          | PPP5C  | Promoting apoptosis of cancer cells, cell-cycle regulation                      |
| Ppp6                   | Ppp6c          | PPP6C  | NA                                                                              |
| Ppp7                   | Ppp7c $\alpha$ | PPEF1  | NA                                                                              |
|                        | Ppp7c $\beta$  | PPEF2  |                                                                                 |

Supplementary Table 2. Baseline clinicopathological characteristics of patients with pancreatic cancer

| Valuables              | Category       | Characteristics |
|------------------------|----------------|-----------------|
| Gender                 | Male           | 37 (67.3%)      |
|                        | Female         | 18 (32.7%)      |
| Age                    | Median (Range) | 63 (36-85)      |
| Primary tumor location | Head and neck  | 32 (58.2%)      |
|                        | Body and tail  | 23 (41.8%)      |
| Nuclear grade          | I-II           | 45 (81.8%)      |
|                        | III            | 10 (18.2%)      |
| Vascular invasion      | No             | 28 (50.9%)      |
|                        | Yes            | 27 (49.1%)      |
| T stage                | 1              | 4 (7.3%)        |
|                        | 2              | 43 (78.2%)      |
|                        | 3              | 8 (14.5%)       |
| N stage                | 0              | 33 (60.0%)      |
|                        | 1              | 22 (40.0%)      |
| Jaundice               | No             | 42 (76.4%)      |
|                        | Yes            | 13 (23.6%)      |
| Abdominal pain         | No             | 22 (40.0%)      |
|                        | Yes            | 33 (60.0%)      |

Supplementary Table 3. The protein expression level and prognostic value of PPPcs.

| Gene   | Expression level (number of patients) |        |     |              | Prognostic Value |              |              |
|--------|---------------------------------------|--------|-----|--------------|------------------|--------------|--------------|
|        | High                                  | Medium | Low | Not detected | Favourable       | Unfavourable | Unprognostic |
| PPP1CA | 0                                     | 6      | 3   | 1            |                  | 5.05E-03     |              |
| PPP1CB | 0                                     | 10     | 1   | 1            |                  | 1.54E-03     |              |
| PPP1CC | 1                                     | 2      | 3   | 5            |                  | 4.96E-03     |              |
| PPP2CA | 0                                     | 2      | 1   | 6            |                  | 1.34E-02     |              |
| PPP2CB | 0                                     | 2      | 1   | 6            |                  | 4.50E-02     |              |
| PPP3CA | 0                                     | 5      | 2   | 4            |                  | 3.82E-04     |              |
| PPP3CB | 2                                     | 6      | 2   | 1            | 6.96E-05         |              |              |
| PPP3CC | 0                                     | 0      | 0   | 11           |                  |              | 8.84E-02     |
| PPP4C  | 2                                     | 6      | 0   | 0            |                  |              | 2.52E-01     |
| PPP5C  | 5                                     | 5      | 1   | 0            |                  |              | 5.56E-02     |
| PPP6C  | 0                                     | 2      | 1   | 9            | 1.71E-02         |              |              |
| PPEF1  | 4                                     | 2      | 1   | 1            |                  |              | 1.70E-01     |
| PPEF2  | --                                    | --     | --  | --           |                  |              |              |
